# Supplementary material for: The role of actin protrusion dynamics in cell migration through a degradable viscoelastic extracellular matrix: Insights from a computational model
Source: PLOS journal article supplement (doi:10.1371/journal.pcbi.1007250), 2020-01-13
Supplement: S6 (10.1371/journal.pcbi.1007250.s006) [file journal.pcbi.1007250.s006]

## S1 Figure. Cell Polarization

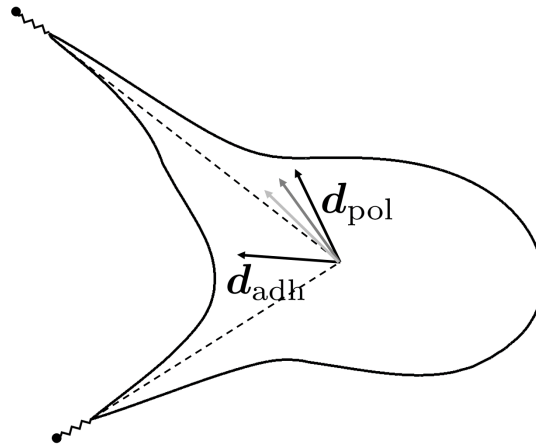

Figure 1: Illustration of polarization of the cell towards the average adhesion direction. The polarization direction  $d_{pol}$  rotates with a fixed polarization rate  $r_{pol}$  towards the average adhesion direction  $d_{adh}$  as seen from the center of mass of the cell. When the polarization direction reaches the average adhesion direction it stops rotating until the average adhesion direction is changed.
